# Supplementary material for: p37 regulates VCP/p97 shuttling and functions in the nucleus and cytosol
Source: PubMed Central journal article supplement (PMC11068011; doi:10.1126/sciadv.adl6082), 2024-05-03
Supplement: sciadv.adl6082_sm.pdf [file sciadv.adl6082_sm.pdf]

Supplementary Materials for  
**p37 regulates VCP/p97 shuttling and functions in the nucleus and cytosol**

Lidia Wrobel *et al.*

Corresponding author: David C. Rubinsztein, [dcr1000@cam.ac.uk](mailto:dcr1000@cam.ac.uk)

*Sci. Adv.* **10**, eadl6082 (2024)  
DOI: 10.1126/sciadv.adl6082

**This PDF file includes:**

Figs. S1 to S7

**Figure S1**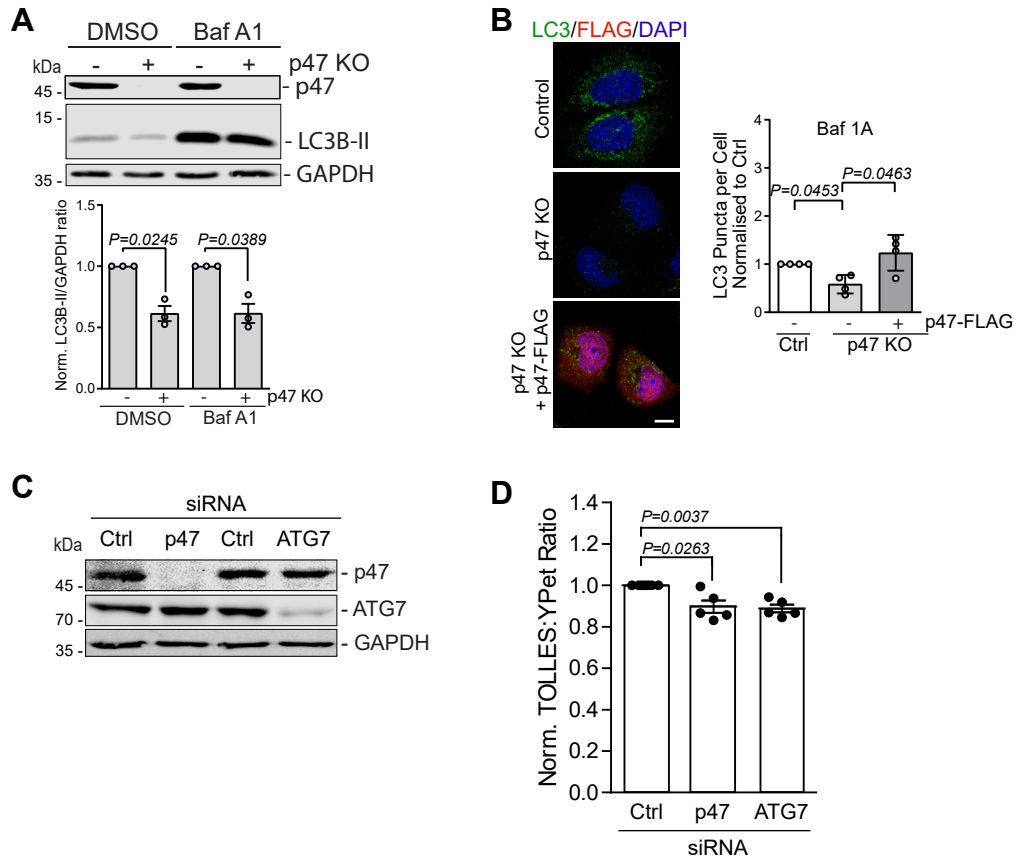

**fig. S1. p47 regulates autophagy.**

(A) Control and p47 knockout HeLa cells were treated with 400 nM Bafilomycin A1 (BafA1) for 4 h, followed by western blot analysis; n=3, one sample t-test, data are mean  $\pm$  SEM. (B) Control, p47 knockout and p47 knockout expressing wild-type p47-FLAG HeLa cells were treated with 400 nM BafA1 for 4 h, followed by immunostaining for LC3 puncta and FLAG; quantification of LC3 puncta normalised to control (n=4, one-way ANOVA (P=0.0296) with post hoc Tukey test), data are mean  $\pm$  SEM. (C) Protein levels were analysed in HeLa cells expressing SRAI-LC3B treated with control or siRNA against p47 or ATG7. Related to Fig. 1G and Fig. S1E. (D) HeLa cells expressing SRAI-LC3B treated with control or siRNA against p47 or ATG7 were analysed by FACS; n=5, one sample t-test, data are mean  $\pm$  SEM. Scale bars, 10  $\mu$ m. In all cDNA transfection experiments, matched empty vectors were used as controls for overexpression constructs. Similarly, in all knockdown experiments we used non-targetting control siRNAs.

**Figure S2**

**A**

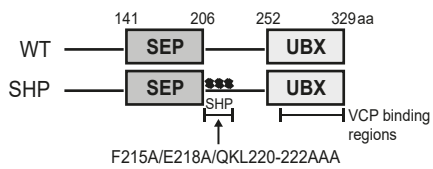

**B**

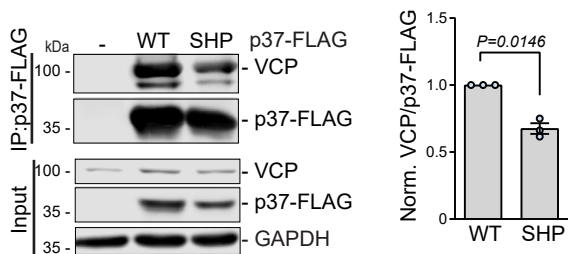

**C**

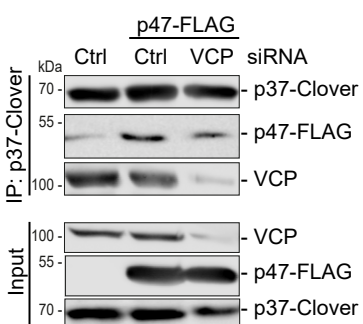

**D**

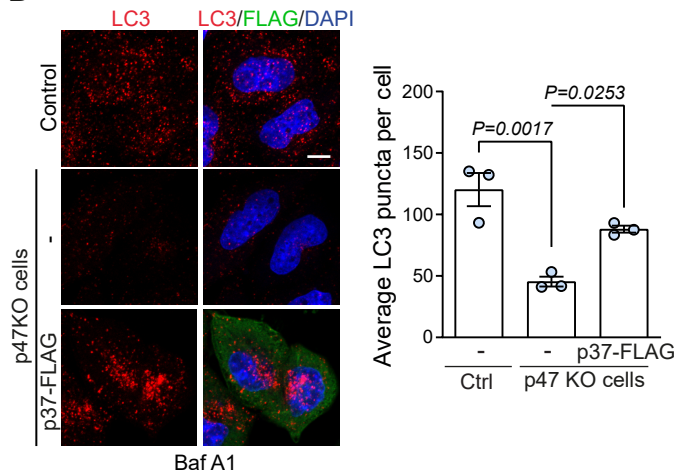

**E**

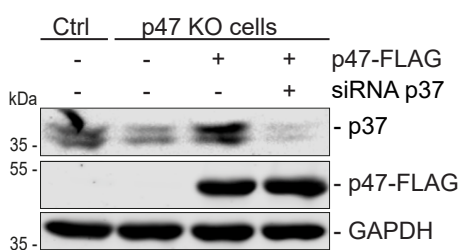

**fig. S2. p47 regulates p37 levels.**

(A) Schematic representation of constructs expressing wild-type (WT) p37 and p37 SHP mutant. (B) Immunoprecipitation (IP) of a wild-type (WT) p37 and p37 SHP mutant-FLAG from HeLa cells. Binding between VCP and p37 SHP mutant was decreased when compared to wild-type p37; n=3, one sample t-test. (C) Immunoprecipitation (IP) of wild-type p47-FLAG from HeLa cells expressing wild-type p37-Clover. Cells were pretreated with siRNA against VCP for 48 h prior IP where indicated. Interaction between p47 and p37 was still observed in cells where VCP was depleted. (D) Control, p47 knockout and p47 knockout cells expressing wild-type p37-FLAG were treated with 400 nM Bafilomycin A1 (BafA1) for 4 h, followed by immunostaining for LC3 puncta and FLAG; n=3, one-way ANOVA (P=0.0021) with post hoc Tukey test. (E) Wild-type p47-FLAG was expressed in p47 knockout HeLa cells for 24 h, pretreated with siRNA against p37 for 72 h where indicated, followed by western blot analysis together with control cells. Data are mean  $\pm$  SEM, scale bars, 10  $\mu$ m. In all cDNA transfection experiments, matched empty vectors were used as controls for overexpression constructs. Similarly, in all knockdown experiments we used non-targeting control siRNAs.

**Figure S3**

**A**

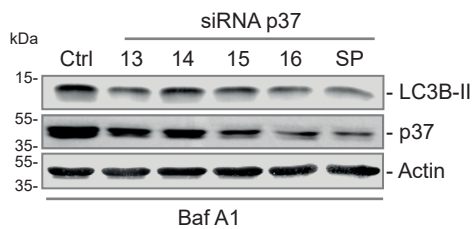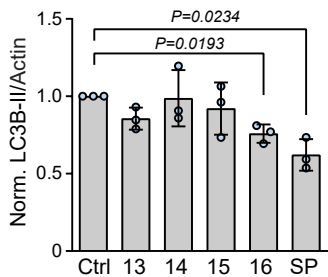

**B**

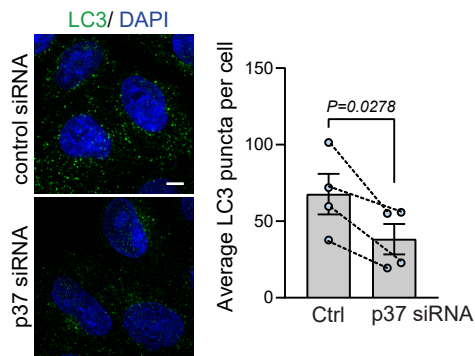

**C**

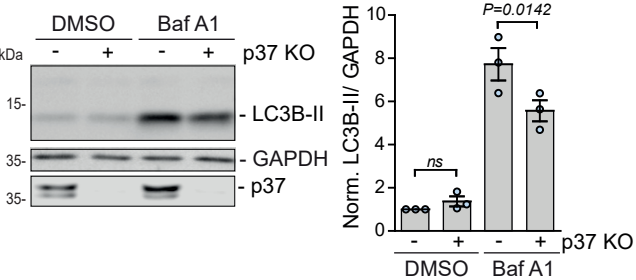

**D**

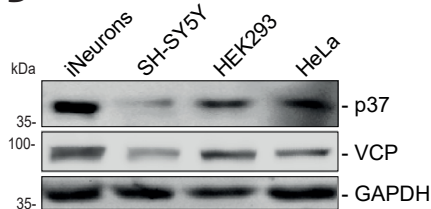

**E**

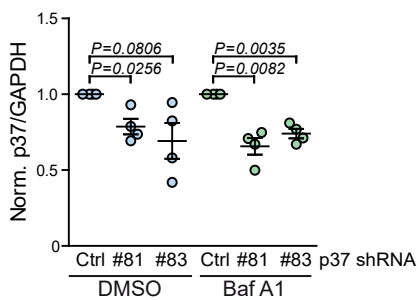

**F**

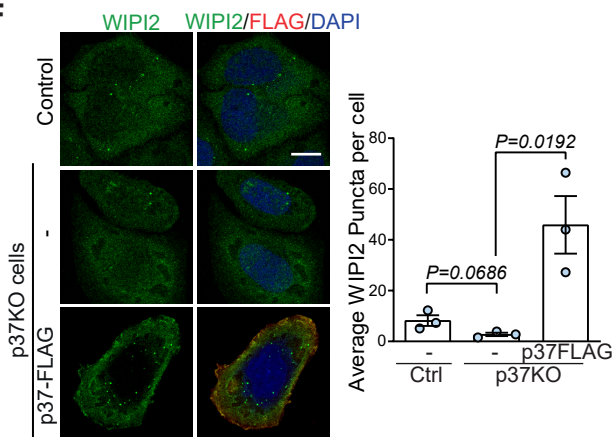

**G**

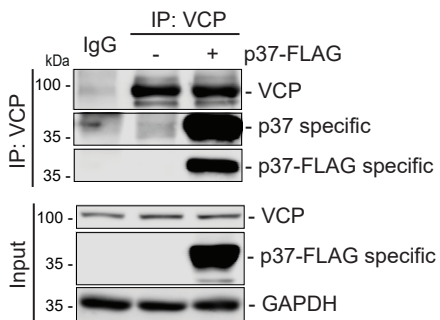

**Fig. S3. p37 regulates autophagosome biogenesis.**

(A) HeLa cells were treated with control, smart pool (SP) or single siRNA oligos against p37 for 48 h, followed by treatment with 400 nM Bafilomycin A1 (BafA1) for 4 h and western blot analysis; n=3, one sample t-test, data are mean  $\pm$  SEM. (B) HeLa cells were treated with control or siRNA against p37 for 48 h, followed by treatment with 400 nM Bafilomycin A1 (BafA1) for 4 h and immunostaining for LC3; n=4, two-tailed Student's t-test, data are mean  $\pm$  SEM. (C) Control and p37 knockout HeLa cells were treated with 400 nM Bafilomycin A1 (BafA1) for 4 h where indicated, followed by western blot analysis; n=3, two-tailed Student's t-test, data are mean  $\pm$  SEM. (D) Protein lysates from human iPSC-derived neurons (iNeurons), SH-SY5Y, HEK293 and HeLa cells were analysed by western blot for the levels of p37 and VCP. (E) Quantification of p37 levels related to Fig. 3B. iNeurons treated with lentiviral-delivered p37 shRNA (#81 or #83) for 4 days were treated with 400 nM BafA1 for 6 h; n=4, one sample t-test, data are mean  $\pm$  SEM. (F) Control, p37 knockout or p37 knockout HeLa cells expressing wild-type p37-FLAG were incubated in EBSS starvation medium for 2 h, followed by immunostaining for WIPI2 and FLAG; n=3, two-tailed unpaired Student's t-test, data are mean  $\pm$  SEM. (G) Endogenous immunoprecipitation of VCP from p37-FLAG expressing cells, showing (p37 or FLAG specific antibodies) p37-FLAG binding with VCP. Scale bars, 10  $\mu$ m. In all cDNA transfection experiments, matched empty vectors were used as controls for overexpression constructs. Similarly, in all knockdown experiments we used non-targetting control siRNAs/shRNAs.

**Figure S4**

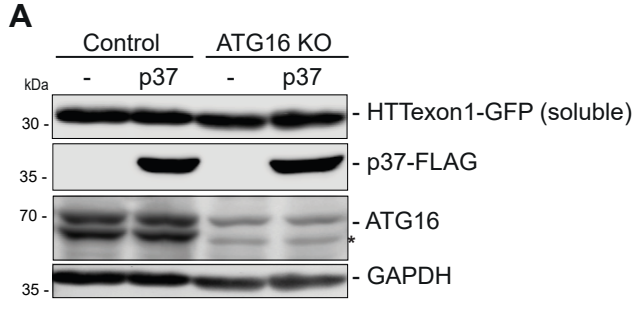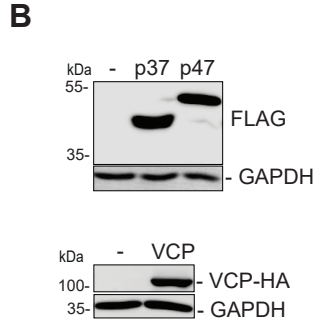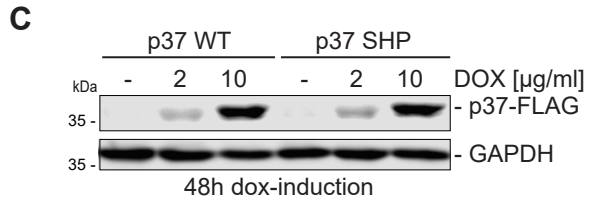



**Fig. S4. p37 regulates clearance of aggregate-prone proteins.**

(A) Related to Fig. 4B, showing an equal expression of soluble HTTQ74-EGFP at 24 h in control and ATG16 knockout cells expressing p37-FLAG. (B) Related to Fig. 4C, showing expression of p37-FLAG, p47-FLAG and VCP-HA. (C) Related to Fig. 4D. A53T-SNCA-EGFP HeLa cells stably expressing wild-type (WT) p37-FLAG or p37 SHP-FLAG mutant under doxycycline-induced promoter were treated with increasing concentrations of doxycycline for 48 h, prior to western blot analysis; \*, unspecific band. In all cDNA transfection experiments, matched empty vectors were used as controls for overexpression constructs.

**Figure S5****A**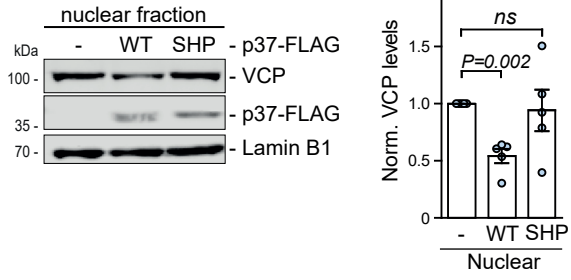**B**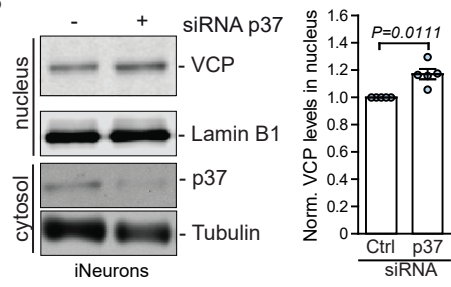**C**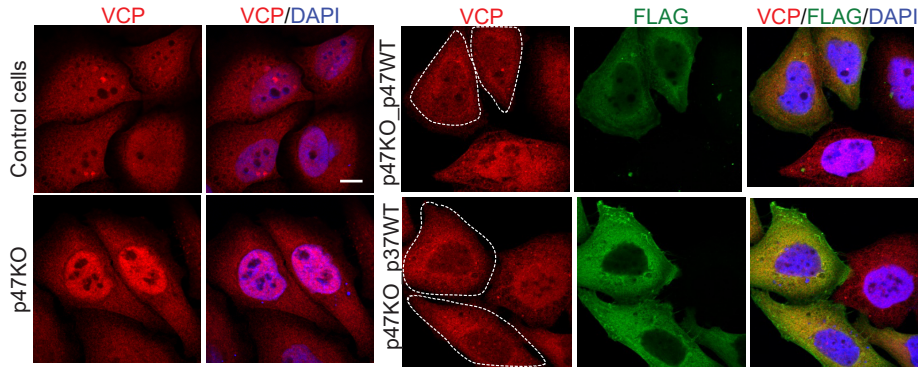

**Fig. S5. p37 regulates VCP nucleocytoplasmic shuttling.**

(A) Nuclear fraction from HeLa cells expressing wild-type (WT) p37-FLAG or p37 SHP-FLAG mutant was analysed by western blotting for VCP levels, with Lamin B1 as a nuclear marker; n=4, one sample t-test, data are mean  $\pm$  SEM. (B) iNeurons treated with lentiviral-delivered p37 shRNA (#83) for 4 days were fractionated into cytosolic and nuclear fractions, followed by western blot analysis for VCP levels, with Lamin B1 as a nuclear marker; n=5, one sample t-test, data are mean  $\pm$  SEM. (C) Control, p47 knockout and p47 knockout HeLa cells expressing wild-type (WT) p37-FLAG or wild-type (WT) p47-FLAG were immunostained for VCP and FLAG. Scale bars, 10  $\mu$ m. In all cDNA transfection experiments, matched empty vectors were used as controls for overexpression constructs. Similarly, in all knockdown experiments we used non-targetting control siRNAs.

**Figure S6**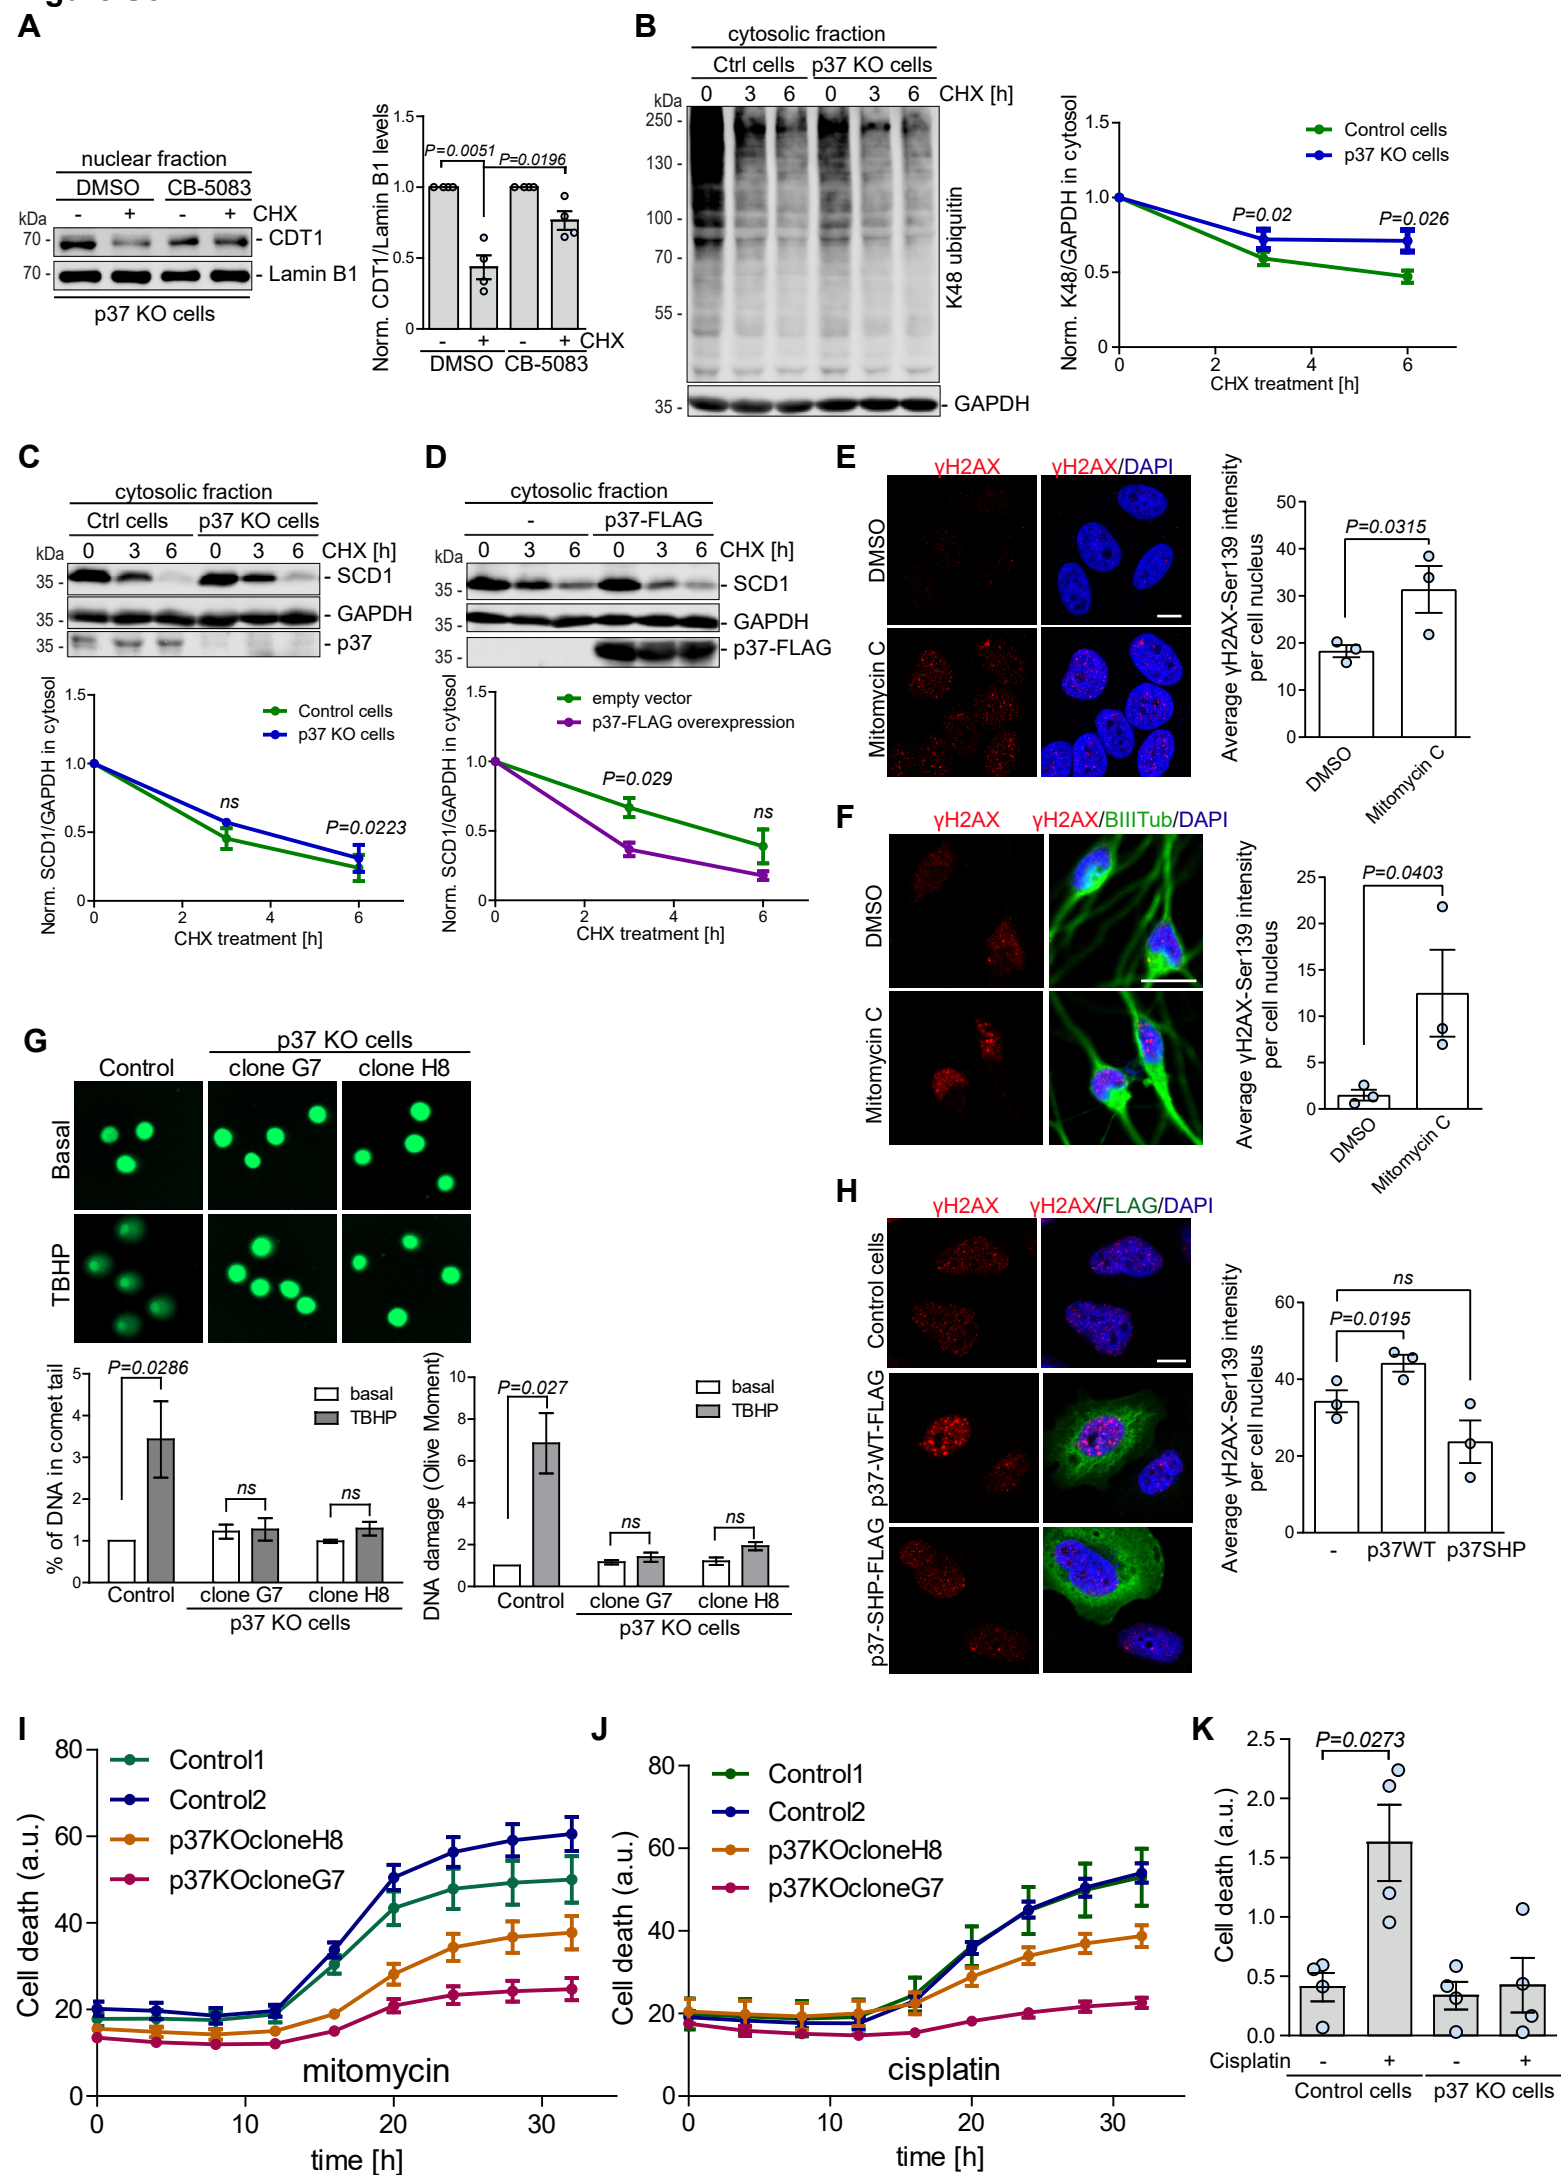

**fig. S6. p37-mediated VCP shuttling regulates ERAD and DNA damage pathways.**

(A) p37 knockout HeLa cells were treated with cycloheximide (CHX, 50  $\mu\text{g/ml}$ ) for 4 h in the presence or absence of 5  $\mu\text{M}$  CB-5083 VCP inhibitor (with 1 h pretreatment prior CHX addition), followed by nuclear fraction isolation and western blot analysis for CDT1 levels;  $n=4$ , one sample *t*-test. (B) Control or p37 knockout HeLa cells were treated with cycloheximide (CHX, 50  $\mu\text{g/ml}$ ) for indicated time points, followed by cytosolic fraction isolation and western blot analysis for K48-ubiquitin-conjugated protein levels;  $n=3$ , two-tailed Student's *t*-test, data normalised to 0 h time point. (C, D) Control and p37 knockout (C) or control and p37-FLAG overexpressing HeLa cells (D) were treated with cycloheximide (CHX, 50  $\mu\text{g/ml}$ ) for indicated time points, followed by cytosolic fraction isolation and western blot analysis for SCD1 levels,  $n=3$ , two-tailed Student's *t*-test, data normalised to 0 h time point. (E) Control experiment. HeLa cells were treated with mitomycin C (1  $\mu\text{g/ml}$ ) for 2 h. followed by immunostaining for  $\gamma$ -H2AX-Ser319;  $n=3$ , one-tailed paired Student's *t*-test; scale bar, 10  $\mu\text{m}$ . (F) Control experiment. iNeurons were treated with mitomycin C (1  $\mu\text{g/ml}$ ) for 6 h. followed by immunostaining for  $\gamma$ -H2AX-Ser319;  $n=3$ , one-tailed paired Student's *t*-test; scale bar, 10  $\mu\text{m}$ . (G) Alkaline comet assay. Control and p37 knockout cells (clonal line G7 and H8) were treated for 1 h with 100  $\mu\text{M}$  tert-Butyl hydroperoxide (TBHP) and analysed using alkaline comet assay;  $n=4$ , two-tailed Student's *t*-test. (H) Control or HeLa cells expressing with wild-type (WT) p37-FLAG or p37 SHP-FLAG mutant were treated with mitomycin C (1  $\mu\text{g/ml}$ ) for 2 h, followed by immunostaining for  $\gamma$ -H2AX-Ser319 and FLAG;  $n=3$ , two-tailed Student's *t*-test, scale bar, 10  $\mu\text{m}$ . (I-K) Two control lines (Control 1, Control 2) and two p37 knockout lines (p37KOcloneH8, p37KOcloneG7) were treated with mitomycin C (2  $\mu\text{g/ml}$ ) (I) or 12  $\mu\text{M}$  cisplatin (J,K) for 32 h and cell death was monitored every 4 h, data are plotted as average of CellTox™ Green Dye signal with  $\pm$  SD of areas analysed per well; statistical analysis in (K),  $n=4$ , data are represented as slope values of cell death curve over time, one-way ANOVA ( $P=0.0029$ ) with post hoc Tukey test. Data are mean  $\pm$  SEM. In all cDNA transfection experiments, matched empty vectors were used as controls for overexpression constructs.

**Figure S7**

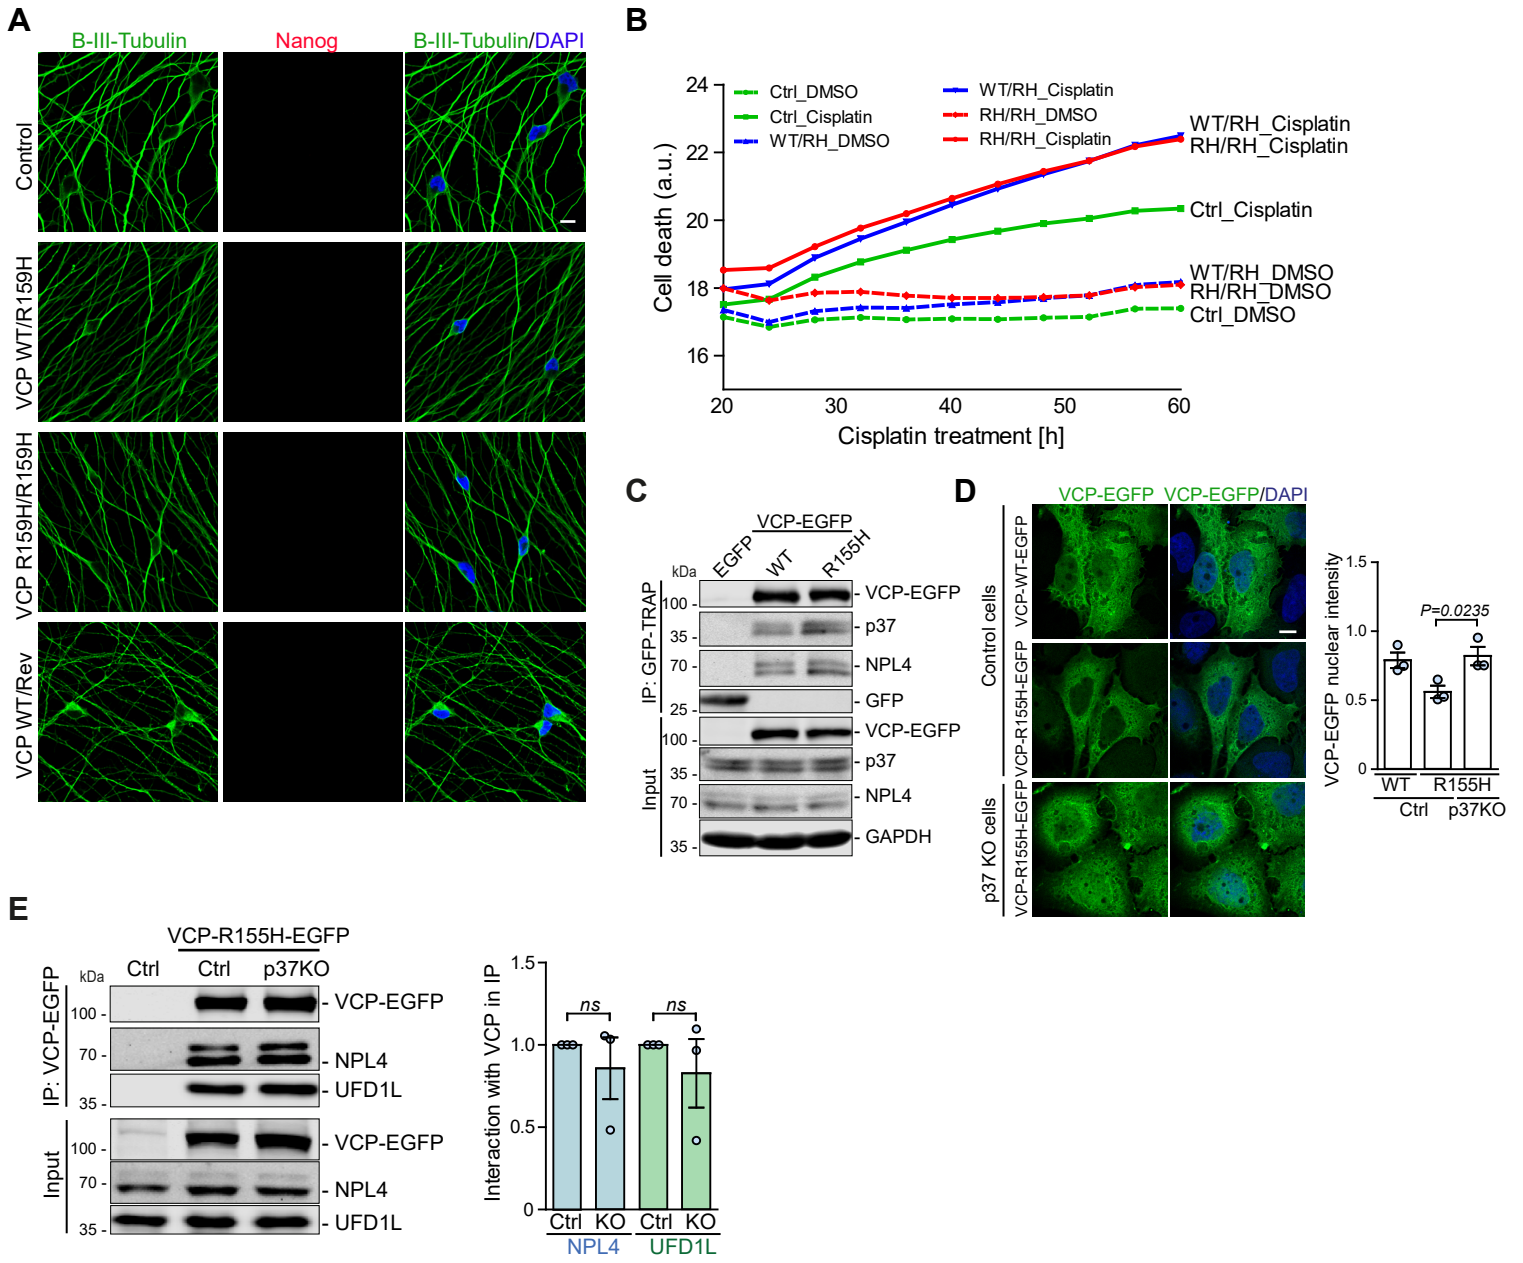

**fig. S7. Depletion of p37 restores suppressed nuclear localisation of VCP proteinopathy mutant.**

(A) Control, heterozygous VCP R159H mutant (WT/R159H), homozygous VCP R159H mutant (R159H/R159H) and control revertant (Rev) iNeurons were differentiated for 14 days, followed by immunostaining with neuronal marker  $\beta$ -III-Tubulin and stem cells marker Nanog. No signal from Nanog and positive signal from  $\beta$ -III-Tubulin confirms successful differentiation into iNeurons. (B) Representative experiment related to Fig. 7C. Control, heterozygous VCP R159H mutant (WT/R159H), homozygous VCP R159H mutant (R159H/R159H) were treated with DMSO or 12  $\mu$ M Cisplatin for 60 h and cell death was monitored every 4 h, data are plotted as average of CellTox™ Green Dye signal per well. (C) HeLa cells expressing just EGFP, wild-type (WT) VCP-EGFP or VCP-R155H mutant-EGFP were lysed and VCP-EGFP was immunoprecipitated together with its cofactors, followed by western blot analysis. (D) Control or p37 knockout cells expressing wild-type (WT) VCP-EGFP or VCP-R155H mutant-EGFP were analysed for the GFP signal in the nuclear compartment; n=3, one-way ANOVA (P=0.0271) with post hoc Tukey test, data are mean  $\pm$  SEM. (E) Control or p37 knockout cells expressing VCP-R155H mutant-EGFP were lysed and VCP-R155H mutant-EGFP was immunoprecipitated together with its cofactors, followed by western blot analysis; n=3, one sample t-test, data are mean  $\pm$  SEM. Scale bars, 10  $\mu$ m. In all cDNA transfection experiments, matched empty vectors were used as controls for overexpression constructs.
